## Biological control protects tropical forests

Wyckhuys, K.A.G.<sup>1,2,3,4,5</sup>, Hughes, A.C.<sup>6</sup>, Buamas, C.<sup>7</sup>, Johnson, A.C.<sup>8</sup>, Vasseur, L.<sup>3,9</sup>,  
Reymondin, L.<sup>10</sup>, Deguine, J.P.<sup>11</sup>, Sheil, D.<sup>12</sup>

1. Zhejiang University, Hangzhou 310000, People's Republic of China;
2. University of Queensland, Brisbane, Australia;
3. Joint International Research Laboratory of Ecological Pest Control, Ministry of Education, Fuzhou 350002, People's Republic of China;
4. China Academy of Agricultural Sciences CAAS, Beijing, People's Republic of China;
5. CGIAR Program on Roots, Tubers and Banana (CRP-RTB), International Center for Tropical Agriculture CIAT, Hanoi, Viet Nam;
6. Xishuangbanna Tropical Botanical Gardens, China Academy of Sciences, Xishuangbanna (Yunnan), China;
7. Department of Agriculture (DoA), Ministry of Agriculture and Cooperatives, Bangkok, Thailand;
8. Graham Centre for Agricultural Innovation, Charles Sturt University, Orange, NSW, Australia;
9. Brock University, St. Catharines (Ontario), Canada
10. International Center for Tropical Agriculture CIAT, Hanoi, Viet Nam
11. CIRAD, La Reunion, France
11. Norwegian University of Life Sciences, P.O. Box 5003, 1432 Ås, Norway

26 **Abstract**

27

28 Biological control of invasive species can restore crop yields, and thus ease land pressure and  
29 contribute to forest conservation. In this study, we show how biological control against the  
30 mealybug *Phenacoccus manihoti* (Hemiptera) slowed deforestation across Southeast Asia. In  
31 Thailand, the newly-arrived mealybug caused an 18% decline in cassava yields over 2009-2010,  
32 a shortfall in national production and an escalation in the price of cassava products. This spurred  
33 an expansion of cassava cropping in neighboring countries from 713,000 ha in 2009 to >1  
34 million ha by 2011: satellite imagery reveal 388%, 330%, 185% and 608% increases in peak  
35 deforestation rates in Cambodia, Lao PDR, Myanmar and Viet Nam focused in cassava crop  
36 expansion areas. Following release of the host-specific natural enemy *Anagyrus lopezi*  
37 (Hymenoptera) in 2010, mealybug outbreaks were reduced, cropping area contracted and  
38 associated deforestation slowed by 31-94% in individual countries. When used with due caution  
39 and according to current guidelines, biological control offers broad benefits for people and the  
40 environment.

41

42

43 The UN Sustainable Development Goals aim to end malnutrition and poverty while also  
44 preventing biodiversity loss<sup>1</sup>. These goals place competing demands on land that are not readily  
45 reconciled<sup>2-4</sup>. For example, agricultural expansion serves many fundamental needs but often  
46 results in the clearing of forests with negative consequences for biodiversity, fresh water and  
47 atmospheric composition<sup>5,6</sup>. Given the need to reconcile such competing demands on land, we  
48 must identify and promote all appropriate options including those, such as arthropod biological  
49 control, that are often disregarded. Here, for the first time, we show how biological control can  
50 reduce pressure on land and thus spare forests.

51 Invasive species, including many agricultural pests, constrain the production of food and other  
52 commodities<sup>7</sup>, and often impose additional costs such as the disruption of ecosystem services  
53 (e.g., nutrient cycling), damage to infrastructure or increased disease in humans<sup>8</sup>. Since the late  
54 1800s, more than 200 invasive insect pests and over 50 weeds across the globe have been  
55 completely or partially suppressed through biological control, often with favorable benefit:cost  
56 ratios (ranging from 5:1 to >1,000:1)<sup>9, 10</sup>. Modern biological control, centered on a careful  
57 selection and subsequent introduction of a specialized natural enemy (from the pest species'  
58 region of origin), thus offers an effective solution for invasive species problems<sup>11</sup>. This approach  
59 is particularly useful in smallholder farming systems, as biological control is self-propagating  
60 and requires little involvement from local stakeholders<sup>12</sup>. Nonetheless there are risks as  
61 exemplified by few (poorly-selected) control agents that have subsequently become major  
62 problems themselves, such as the cane toad *Buffo marinus* or the weevil *Rhinocyllus conicus*<sup>13,</sup>  
63<sup>14</sup>. A consequence is that, despite significant improvements in risk assessment and management  
64 over the past three decades, concerns often obscure the potential benefits and result in biological  
65 control being avoided when it could be valuable<sup>13</sup>. While the failures of the last century appear

66 well known, the more modern success stories require wider recognition. Our goal here is to  
67 present one such story.

68 In 2010, biological control was implemented against the invasive mealybug, *Phenacoccus*  
69 *manihoti* (Hemiptera: Pseudococcidae) that had first been detected in late 2008 in Thailand's  
70 cassava crop. Grown on nearly 4 million ha across tropical Asia and extensively traded, cassava,  
71 *Manihot esculenta* Crantz, is a globally-important source of starch, a food staple for vulnerable  
72 rural populations in several Asian countries, and a base for the production of food products,  
73 animal feed, ethanol and household items <sup>15</sup>. In Southeast Asia, cassava is cultivated as much in  
74 small-scale diversified systems by smallholders as in large plantations. Upon arrival in Asia, *P.*  
75 *manihoti* spread to its ecological limits (yet confined by cassava cropping area) <sup>16</sup>, leading to an  
76 average 4.1 ton/ha reduction in crop yield in Thailand (from 22.7 to 18.6 ton/ha), a 27% drop in  
77 the nation's aggregate cassava production and an ensuing 162% increase in starch price <sup>15</sup>. One  
78 response was the 2009 introduction of the host-specific parasitoid wasp *Anagyrus lopezi*  
79 (Hymenoptera: Encyrtidae; originally native to South America) from Benin (West Africa), where  
80 it had suppressed *P. manihoti* throughout Africa following its introduction in 1981 <sup>17</sup>. These  
81 wasps were released across Thailand from mid-2010 onward, and were subsequently introduced  
82 into Lao PDR, Cambodia and Viet Nam (2011-2013). They established successfully and  
83 suppressed mealybug populations across the region <sup>18</sup>. This restored yields by 5.3-10.0 tonnes/ha  
84 (as assessed through manipulative assays), and helped stabilize the trade in cassava root, starch  
85 and substitute commodities (i.e., maize, wheat, potato) <sup>15</sup>.

86 In this study, we characterized how the cassava mealybug invasion and ensuing biological  
87 control are associated with agricultural expansion and forest loss in mainland Southeast Asia.  
88 These forests include the most species-rich and biologically-valuable habitats in the region <sup>19,20</sup>.

89 We first conducted surveys to quantify the extent of parasitoid-mediated *P. manihoti* population  
90 suppression (*section i*). Second, we examined regional cassava cultivation and trade from 2009  
91 to 2013 (*section ii*). Third, we contrasted forest loss and cassava expansion over the period  
92 (*section iii*).

93

94

## 95 **Results**

96

### 97 i. Regional pest & parasitoid survey

98

99 Our surveys, conducted across mainland Southeast Asia between 2014 to 2017 (i.e., 6-9 years  
100 and 5-8 years following the initial *P. manihoti* detection and *A. lopezi* introduction, respectively),  
101 showed that *P. manihoti* was present in 37.0% of the fields ( $n= 549$ ) and comprised 20.8%  
102 abundance within a speciose mealybug complex (Fig. 1). Among sites, *P. manihoti* reached  
103 field-level incidence of  $7.6 \pm 15.9\%$  (mean  $\pm$  SD; i.e., proportion mealybug-affected tips) and  
104 abundance of  $5.2 \pm 19.8$  insects per infested tip. *Anagyrus lopezi* wasps were recorded in 96.9%  
105 of mealybug-affected fields ( $n= 97$ ), at highly-variable parasitism rates. For example, in mid- to  
106 large-scale plantations parasitism rates ranged from  $10.7 \pm 10.6\%$  ( $n= 20$ ; Dong Nai, Vietnam) to  
107  $67.1 \pm 20.8\%$  ( $n= 22$ ) in late dry season in Tay Ninh (Vietnam). In low-input, smallholder-  
108 managed systems (see methods), parasitism varied between  $17.1 \pm 14.8\%$  ( $n= 18$ ; Ba Ria Vung  
109 Tau – BRVT, Vietnam) to  $46.7 \pm 27.8\%$  in central Cambodia ( $n= 10$ ). Where *A. lopezi* was  
110 present, mealybug abundance was negatively associated with *A. lopezi* parasitism (ANOVA,  
111  $F_{1,84}= 12.615$ ,  $p= 0.001$ ; Fig. 1; <sup>18</sup>).

112

### 113 ii. Country-specific cassava production and trade

114

115 In Thailand, cassava cropping area reached 1.32 million ha in 2009, and subsequently fell to  
116 1.18 million (2010) and 1.13 million ha (2011). This followed the country-wide *P. manihoti*  
117 outbreak in 2009, yield losses as experienced over an 8-10 month time lapse (with cassava a

118 semi-perennial crop, routinely harvested at 8-10 months of age), and reduced total cassava  
119 production. Over the ensuing 2009-10 cropping season, province-level yields dropped by  $12.59 \pm$   
120  $9.78\%$  (area-weighted mean:  $-18.2\%$ ) and country-wide aggregate yields declined from  $22.67$   
121  $t/ha$  to  $18.57 t/ha$  (Fig. 2). Regional production followed similar trends: total production in Viet  
122 Nam, Myanmar, Lao PDR and Cambodia dropped from  $66.93$  million tonnes in 2009 (at yields  
123 of  $19.42 t/ha$ ) to  $62.04$  million tonnes in 2010 (at  $18.56 t/ha$ ). Yet, over 2009-2011,  $129.7\%$ ,  
124  $387.0\%$ ,  $52.8\%$ , and  $16.0\%$  increases were recorded in the volume of harvested cassava root in  
125 Cambodia, Lao PDR, Myanmar and Viet Nam respectively. Over this period, cassava cropping  
126 area in all countries increased substantially, for example expanding from  $160,326 ha$  to  $369,518$   
127  $ha$  in Cambodia (Fig. 3; Supplementary Figure 1).

128 From 2009 to 2012 regional trade in cassava-based commodities shifted, as Thailand's import  
129 of cassava products (i.e., roots, chips and pellets) increased by  $153\%$  and starch by  $1,575\%$ , and  
130 Viet Nam exported more of these products to China. In 2009, Thai imports represented  $1,126$   
131 tonnes of cassava products from Lao PDR, and  $322,889$  tonnes from Cambodia. By 2012,  
132 respective volumes had attained  $19,844$  tonnes and  $799,456$  tonnes. In 2009, Viet Nam's exports  
133 of cassava products to China reached  $2.09$  million tonnes, and increased to  $2.21$  million tonnes  
134 by 2012. Over this period there was a regional increase in cassava cropping area from  $713,000 ha$   
135 (2009) to  $>1.02$  million  $ha$  by 2011 (Fig. 3; Supplementary Figure 1). In all countries except Lao  
136 PDR, cropping area was greatest in 2011 and reached  $369,500 ha$  in Cambodia,  $56,500 ha$  in  
137 Myanmar, and  $558,200 ha$  in Viet Nam (Supplementary Fig. 2). By 2013, cassava area  
138 contracted and Thailand's import trade of cassava products and cassava starch lowered by a  
139 respective  $42.3\%$  and  $83.5\%$ .

140

141      iii. Country-specific forest loss vs. cassava area

142

143      Regional deforestation surged in 2010 with an annual net loss of 653,500 ha from 278,900  
144      during the preceding year (Terra-i; Fig. 4), partially mirroring the 302,000 ha increase in cassava  
145      area harvested during 2011 (for an 8-10 month-long crop; see above). Over 2010, Terra-i  
146      estimated total forest loss to be 166,700 ha in Cambodia, 157,600 ha in Viet Nam, 74,700 ha in  
147      Lao PDR, and 254,400 ha in Myanmar; a respective 169%, 207%, 80% and 104% higher than in  
148      2009. Between 2006 and 2012, the first months of 2010 represented the peak of deforestation  
149      and reached 20,181 ha/week in Cambodia, 17,015 ha/week in Viet Nam and 51,284 ha/week in  
150      Myanmar. For Lao PDR, a peak of 10,128 ha/week was attained in early 2011 (Supplementary  
151      Fig. 2). Peak deforestation rates during the 2010 dry season were a respective 388%, 608%,  
152      185% higher than those in 2009, and for Lao PDR represented a 330% increase. By 2011, peak  
153      deforestation rates in Cambodia, Viet Nam and Myanmar lowered with a respective 42.0%,  
154      31.8% and 94.9% compared to 2010, while peak deforestation rates in Lao PDR lowered by  
155      50.5% in 2012.

156      Examining patterns for provinces, a significant association was recorded between (province-  
157      level, summed) regional deforestation and cassava area growth over 2005-2010 (ANOVA;  $F_{1,60}=$   
158      14.278,  $p < 0.001$ ), over 2010-2013 ( $F_{1,54}= 18.240$ ,  $p < 0.001$ ) and over the entire 2005-2013 time  
159      period ( $F_{1,65}= 18.011$ ,  $p < 0.001$ ) (Fig. 5, 6). For Viet Nam specifically, province-level forest loss  
160      was positively related to extent of (harvested) cassava area growth during 2011-2012 ( $F_{1,24}=$   
161      7.113,  $p= 0.013$ ) and 2012-2013 ( $F_{1,20}= 4.603$ ,  $p= 0.044$ ), but not during 2009-2010 ( $F_{1,27}=$   
162      0.295,  $p= 0.591$ ) or 2010-2011 ( $F_{1,40}= 2.863$ ,  $p= 0.098$ ). Similar patterns and associations were  
163      recorded for Cambodia for 2005-2010 and 2010-2012 (Supplementary Fig. 3). Since 2014,



164 deforestation in Cambodia and Viet Nam has continued (Supplementary Fig. 2), likely reflecting  
165 growth of China's demand for cassava products.

166

167

## 168 **Discussion**

169

170 We have shown how the 2008 *Phenacoccus manihoti* invasion in Thailand contributed to a  
171 >300,000 ha increase in cassava cropping area in neighboring countries, to make up for a  
172 shortfall in supply and an 138-162% surge in cassava prices. More specifically, as the mealybug  
173 invasion is associated with a 243-281% increase in imports of cassava products, cassava trade  
174 thus likely became a key regional driver of deforestation. The mealybug invasion also prompted  
175 broad and recurrent use of insecticides in Thailand (Supplementary files; Supplementary Fig. 4),  
176 with potential impacts on biodiversity, human health<sup>21</sup> and ecosystem functioning<sup>22,23</sup>, including  
177 interference with *P. manihoti* biological control (Wyckhuys et al., unpublished). Given the  
178 importance of cassava for local smallholder families, the changes in cassava productivity (e.g.,  
179 total crop loss in 2009-2010 in parts of Thailand and western Cambodia) also had marked socio-  
180 economic impacts including declines in farmer income. The introduction of *A. lopezi*, allowed  
181 Thailand's cassava production to recover, helped stabilize cassava trade, averted the need for  
182 insecticides in neighboring countries and reduced cassava-driven forest loss in the region.

183 Demand for cassava is an important driver of land-use pressure and forest loss in the Greater  
184 Mekong sub-region, yet it is not the only one, and the *A. lopezi* introduction alone thus will not  
185 avert future deforestation. Other drivers of forest loss are the establishment of oil palm, pulp and  
186 paper plantations, rubber and food crops<sup>24</sup>; crops that are cultivated across tropical Asia through

187 significant engagement from agro-enterprises<sup>24,25</sup>, with their actions regularly affected by ‘place-  
188 less’ incentives (e.g., varietal improvements)<sup>26,27</sup>, (foreign-based) consumer demand<sup>15</sup>, or  
189 chronic soil fertility loss e.g., for cassava in fragile upland settings<sup>28</sup>. Yet, during 2010-2012, our  
190 analyses revealed the marked role of cassava area growth in deforestation at a multi-country  
191 level. To stabilize the forest margin, a multi-functional ‘landscape approach’ and a systematic  
192 analysis of the various drivers of land-use change will be necessary<sup>29</sup>. Also, in order to enhance  
193 the capacity of cropping systems to absorb (or recover from) perturbances such as the *P.*  
194 *manihoti* attack, indices can be adopted that reflect broader ‘ecosystem resilience’. Through use  
195 of those indices, agro-industry can simultaneously contribute to agricultural sustainability and  
196 biodiversity conservation<sup>30,31</sup>. Furthermore, such ‘resilience’ indices could be employed by local  
197 government and agro-industry actors alike to further encourage good practice. By stabilizing  
198 cassava yields and alleviating pressure on land and dependence on insecticides, biological  
199 control supports agricultural intensification and spares land for conservation<sup>4,32</sup>. Nonetheless,  
200 while such land-sparing activities are valuable, these are insufficient to achieve conservation in  
201 the long-term without suitable policies, planning, governance arrangements, funding and  
202 implementation<sup>29,33</sup>.

203 Several factors contributed to the success of the mealybug biological control program. These  
204 include: early detection (e.g.,<sup>34</sup>); proper identification of the pest<sup>35</sup>; availability of and  
205 unrestricted access to an effective host-specific parasitoid<sup>36</sup> and decisive action with private-  
206 sector involvement. These factors allowed an effective program to be swiftly planned, assessed  
207 and implemented<sup>37,38</sup>, without the benefits of biological control being obscured by the risks.  
208 Though few cases have justifiably blemished the reputation of arthropod biological control,  
209 current practices and safeguards minimize such risks<sup>13,39</sup>. Our study equally helps put those

210 risks into perspective, as the rapid *A. lopezi* introduction proved essential to alleviate the  
211 disruptive impacts of *P. manihoti* attack<sup>34,40</sup>. The benefits gained through the *A. lopezi* release  
212 thus need to be viewed in light of the multi-faceted ecosystem impacts of invasive species<sup>41,42</sup>,  
213 and the environmentally-disruptive actions that are regularly employed for their mitigation<sup>43,44</sup>.  
214 Our study illustrates how an invasive pest can lead to substantial loss of forest<sup>45</sup> and accelerating  
215 species loss and extinctions<sup>24,46</sup>, while biological control offered a powerful, environmentally-  
216 benign tool to permanently resolve those impacts<sup>11</sup>. Now, by concurrently highlighting the  
217 harmful and beneficial impacts of *P. manihoti* and *A. lopezi* respectively, our work can enable a  
218 concerted search for ‘win-win’ solutions that address invasive species mitigation, biodiversity  
219 conservation and profitable farming.

220 Biological control requires a reassessment by all those responsible for achieving a better world  
221<sup>2-4,47,48</sup>. While invasive species undermine many of the UN Sustainable Development Goals<sup>1,8,49</sup>  
222 the benefits of biological control are routinely disregarded<sup>13,48</sup>. Though an objective appraisal of  
223 risks remains essential, an equivalent recognition of the benefits is also warranted. When used  
224 with established safeguards<sup>13</sup>, biological control can resolve or reduce the problems caused by  
225 invasive species<sup>11</sup> and helps ensure crop protection benefits not only farmers<sup>38</sup>, but also the  
226 environment.

227

228

229

230 **References**

231

- 232 1 United-Nations. Sustainable Development Goals,  
233 <http://www.unfoundation.org/features/globalgoals/the-global-goals.html> (2013).
- 234 2 Stafford-Smith, M. *et al.* Integration: the key to implementing the Sustainable Development  
235 Goals. *Sustainability Science* **12**, 911-919, doi:10.1007/s11625-016-0383-3 (2017).
- 236 3 Godfray, H. C. J. *et al.* Food security: The challenge of feeding 9 billion people. *Science* **327**,  
237 812-818, doi:10.1126/science.1185383 (2010).
- 238 4 Fischer, J. *et al.* Reframing the Food–Biodiversity Challenge. *Trends in Ecology & Evolution*  
239 **32**, 335-345, doi:<https://doi.org/10.1016/j.tree.2017.02.009> (2017).
- 240 5 Maxwell, S. L., Fuller, R. A., Brooks, T. & Watson, J. The ravages of guns, nets and  
241 bulldozers. *Nature* **536**, 144-146 (2016).
- 242 6 Isbell, F. *et al.* Linking the influence and dependence of people on biodiversity across scales.  
243 *Nature* **546**, 65, doi:10.1038/nature22899 (2017).
- 244 7 Paini, D. R. *et al.* Global threat to agriculture from invasive species. *Proceedings of the*  
245 *National Academy of Sciences of the United States of America* **113**, 7575-7579,  
246 doi:10.1073/pnas.1602205113 (2016).
- 247 8 Bradshaw, C. J. A. *et al.* Massive yet grossly underestimated global costs of invasive insects.  
248 *Nature Communications* **7**, 12986, doi:10.1038/ncomms12986 (2016).
- 249 9 Cock, M. J. W. *et al.* Trends in the classical biological control of insect pests by insects: an  
250 update of the BIOCAT database. *BioControl* **61**, 349-363, doi:10.1007/s10526-016-9726-3  
251 (2016).

- 252 10 Naranjo, S. E., Ellsworth, P. C. & Frisvold, G. B. Economic value of biological control in  
253 integrated pest management of managed plant systems. *Annu. Rev. Entomol.* **60**, 621-645,  
254 doi:10.1146/annurev-ento-010814-021005 (2015).
- 255 11 Heimpel, G. E. & Mills, N. J. *Biological Control: Ecology and Applications*. (Cambridge  
256 University Press, 2017).
- 257 12 Andrews, K. L., Bentley, J. W. & Cave, R. D. Enhancing biological control's contributions to  
258 integrated pest management through appropriate levels of farmer participation. *Fla. Entomol.*  
259 **75**, 429-439 (1992).
- 260 13 Heimpel, G. E. & Cock, M. J. W. Shifting paradigms in the history of classical biological  
261 control. *BioControl* **63**, 27–37, doi:10.1007/s10526-017-9841-9 (2017).
- 262 14 Hoddle, M. S. Restoring balance: using exotic species to control invasive exotic species.  
263 *Conservation Biology* **18**, 38-49, doi:10.1111/j.1523-1739.2004.00249.x (2004).
- 264 15 Wyckhuys, K. A. G. *et al.* Biological control of an invasive pest eases pressures on global  
265 commodity markets. *Environmental Research Letters* (in press).
- 266 16 Yonow, T., Kriticos, D. J. & Ota, N. The potential distribution of cassava mealybug  
267 (*Phenacoccus manihoti*), a threat to food security for the poor. *PLOS ONE* **12**, e0173265,  
268 doi:10.1371/journal.pone.0173265 (2017).
- 269 17 Herren, H. & Neuenschwander, P. Biological control of cassava pests in Africa. *Annu. Rev.*  
270 *Entomol.* **36**, 257-283, doi:10.1146/annurev.en.36.010191.001353 (1991).
- 271 18 Wyckhuys, K. *et al.* Continental-scale suppression of an invasive pest by a host-specific  
272 parasitoid heralds a new era for arthropod biological control. *PeerJ Preprints* **6**,  
273 e27009v27001, doi:10.7287/peerj.preprints.27009v1 (2018).

- 274 19 Collins, N. M. *The conservation atlas of tropical forests: Asia and the Pacific*. (Springer,  
275 1991).
- 276 20 Koh, L. P. *et al. Biodiversity state and trends in Southeast Asia. Encyclopedia of biodiversity*  
277 (2nd ed.) (2013).
- 278 21 Seltenrich, N. Catching up with popular pesticides: more human health studies are needed on  
279 neonicotinoids. *Environmental Health Perspectives* **125**, A41-A42, doi:10.1289/ehp.125-A41  
280 (2017).
- 281 22 Goulson, D. An overview of the environmental risks posed by neonicotinoid insecticides.  
282 *Journal of Applied Ecology* **50**, 977-987, doi:10.1111/1365-2664.12111 (2013).
- 283 23 Woodcock, B. A. *et al. Country-specific effects of neonicotinoid pesticides on honey bees*  
284 *and wild bees. Science* **356**, 1393-1395, doi:10.1126/science.aaa1190 (2017).
- 285 24 Wilcove, D. S., Giam, X., Edwards, D. P., Fisher, B. & Koh, L. P. Navjot's nightmare  
286 revisited: logging, agriculture, and biodiversity in Southeast Asia. *Trends in Ecology &*  
287 *Evolution* **28**, 531-540, doi:10.1016/j.tree.2013.04.005 (2013).
- 288 25 DeFries, R. S., Rudel, T., Uriarte, M. & Hansen, M. Deforestation driven by urban  
289 population growth and agricultural trade in the twenty-first century. *Nature Geoscience* **3**,  
290 178, doi:10.1038/ngeo756 (2010).
- 291 26 Angelsen, A. Policies for reduced deforestation and their impact on agricultural production.  
292 *Proceedings of the National Academy of Sciences of the United States of America* **107**, 19639  
293 (2010).
- 294 27 Carrasco, L.R., Larrosa, C., Milner-Gulland, E.J. & Edwards, D.P., 2014. A double-edged  
295 sword for tropical forests. *Science* **346**(6205), 38-40.

- 296 28 Valentin, C. *et al.* Runoff and sediment losses from 27 upland catchments in Southeast Asia:  
297 Impact of rapid land use changes and conservation practices. *Agriculture, Ecosystems &*  
298 *Environment* **128**, 225-238, doi:10.1016/j.agee.2008.06.004 (2008).
- 299 29 Sayer, J. et al. Ten principles for a landscape approach to reconciling agriculture,  
300 conservation, and other competing land uses. *Proceedings of the National Academy of*  
301 *Sciences* **110**, 8349-8356 (2013).
- 302 30 Galaz, V., Gars, J., Moberg, F., Nykvist, B. & Repinski, C. Why ecologists should care about  
303 financial markets. *Trends in Ecology & Evolution* **30**, 571-580,  
304 doi:10.1016/j.tree.2015.06.015 (2015).
- 305 31 Tayleur, C. *et al.* Global coverage of agricultural sustainability standards, and their role in  
306 conserving biodiversity. *Conserv Lett* **10**, 610-618, doi:10.1111/conl.12314 (2017).
- 307 32 Glamann, J., Hanspach, J., Abson, D. J., Collier, N. & Fischer, J. The intersection of food  
308 security and biodiversity conservation: a review. *Regional Environmental Change* **17**, 1303-  
309 1313, doi:10.1007/s10113-015-0873-3 (2017).
- 310 33 Brondizio, E. S. & Tourneau, F.-M. L. Environmental governance for all. *Science* **352**, 1272-  
311 1273, doi:10.1126/science.aaf5122 (2016).
- 312 34 Simberloff, D. Biological invasions: What's worth fighting and what can be won? *Ecological*  
313 *Engineering* **65**, 112-121, doi:10.1016/j.ecoleng.2013.08.004 (2014).
- 314 35 Wheeler, Q. D., Raven, P. H. & Wilson, E. O. Taxonomy: Impediment or Expedient? *Science*  
315 **303**, 285, doi:10.1126/science.303.5656.285 (2004).
- 316 36 Cock, M. J. W. *et al.* Do new Access and Benefit Sharing procedures under the Convention  
317 on Biological Diversity threaten the future of biological control? *BioControl* **55**, 199-218,  
318 doi:10.1007/s10526-009-9234-9 (2010).

- 319 37 Zeddies, J., Schaab, R. P., Neuenschwander, P. & Herren, H. R. Economics of biological  
320 control of cassava mealybug in Africa. *Agricultural Economics* **24**, 209-219,  
321 doi:10.1111/j.1574-0862.2001.tb00024.x (2001).
- 322 38 Neuenschwander, P. Harnessing nature in Africa. *Nature* **432**, 801-802, doi:10.1038/432801a  
323 (2004).
- 324 39 Hajek, A. E. *et al.* Exotic biological control agents: A solution or contribution to arthropod  
325 invasions? *Biol Invasions* **18**, 953-969, doi:10.1007/s10530-016-1075-8 (2016).
- 326 40 Suckling, D. M. & Sforza, R. F. H. What magnitude are observed non-target impacts from  
327 weed biocontrol? *PLOS ONE* **9**, e84847, doi:10.1371/journal.pone.0084847 (2014).
- 328 41 Ehrenfeld, J. G. Ecosystem consequences of biological invasions. *Annual Review of Ecology,*  
329 *Evolution, and Systematics* **41**, 59-80, doi:10.1146/annurev-ecolsys-102209-144650 (2010).
- 330 42 Early, R. *et al.* Global threats from invasive alien species in the twenty-first century and  
331 national response capacities. *Nature Communications* **7**, 12485, doi:10.1038/ncomms12485  
332 (2016).
- 333 43 Brockerhoff, E. G., Liebhold, A. M., Richardson, B. & Suckling, D. M. Eradication of  
334 invasive forest insects: concepts, methods, costs and benefits. *New Zealand Journal of*  
335 *Forestry Science* **40**, S117-S135 (2010).
- 336 44 Villamagna, A. M. & Murphy, B. R. Ecological and socio-economic impacts of invasive  
337 water hyacinth (*Eichhornia crassipes*): a review. *Freshwater Biology* **55**, 282-298,  
338 doi:10.1111/j.1365-2427.2009.02294.x (2010).
- 339 45 Watson, J.E. *et al.* The exceptional value of intact forest ecosystems. *Nature Ecology &*  
340 *Evolution* **2**, 599–610 (2018).



- 341 46 Brook, B. W., Sodhi, N. S. & Ng, P. K. L. Catastrophic extinctions follow deforestation in  
342 Singapore. *Nature* **424**, 420-426, doi:10.1038/nature01795
- 343 47 Bale, J.S., Van Lenteren, J.C. and Bigler, F., 2008. Biological control and sustainable food  
344 production. *Philosophical Transactions of the Royal Society of London B: Biological*  
345 *Sciences* **363**(1492), pp.761-776.
- 346 48 Barratt, B.I.P. *et al.* The status of biological control and recommendations for improving  
347 uptake for the future. *BioControl* **63**, 155-167.
- 348 49 Hulme, P. E. Trade, transport and trouble: managing invasive species pathways in an era of  
349 globalization. *Journal of Applied Ecology* **46**, 10-18, doi:10.1111/j.1365-2664.2008.01600.x  
350 (2009).
- 351 50 Hansen, M.C. *et al.* High-resolution global maps of 21st-century forest cover change. *Science*  
352 **342**, 850-853 (2013).

353 **Tables & Figures**

354

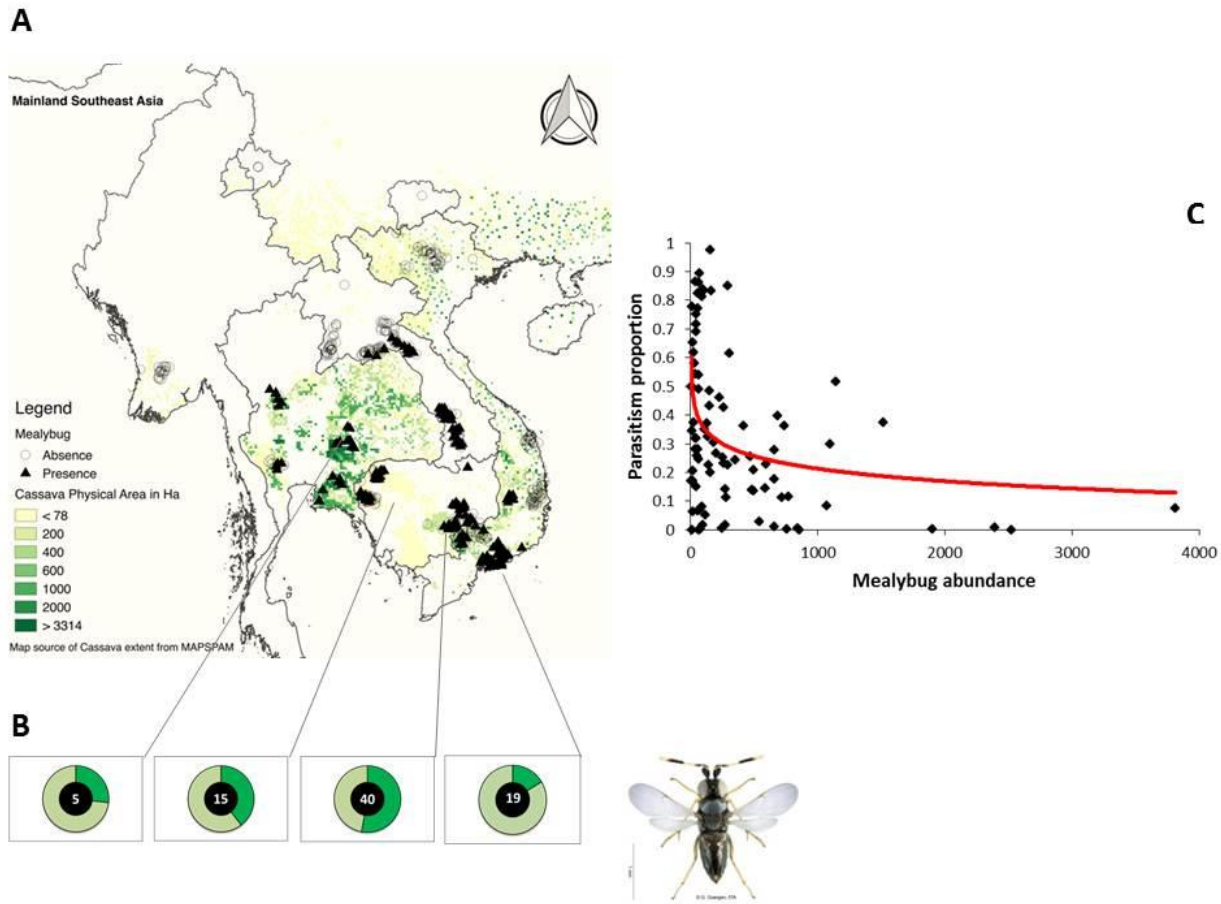

355

356

357 **Figure 1.** Map of Southeast Asia depicting *P. manihoti* geographical distribution,  
358 complemented with field-level *A. lopezi* parasitism and mealybug abundance records. In  
359 *panel A*, green shading reflects the approx. 4 million ha of cassava cultivated regionally in 2005  
360 (MapSpam, 2017). *Panel B* presents doughnut charts, indicative of the percent *A. lopezi*  
361 parasitism (as depicted by the dark green section) at four selected sites. The number inside each  
362 doughnut reflects the number of fields sampled per locale. *Panel C* presents the relationship  
363 between average *P. manihoti* abundance and *A. lopezi* parasitism level per field, for a total of 90  
364 fields in which simultaneous recordings were done of mealybug infestation pressure and  
365 parasitism rate (figure adapted from Wyckhuys et al., 2018).

366

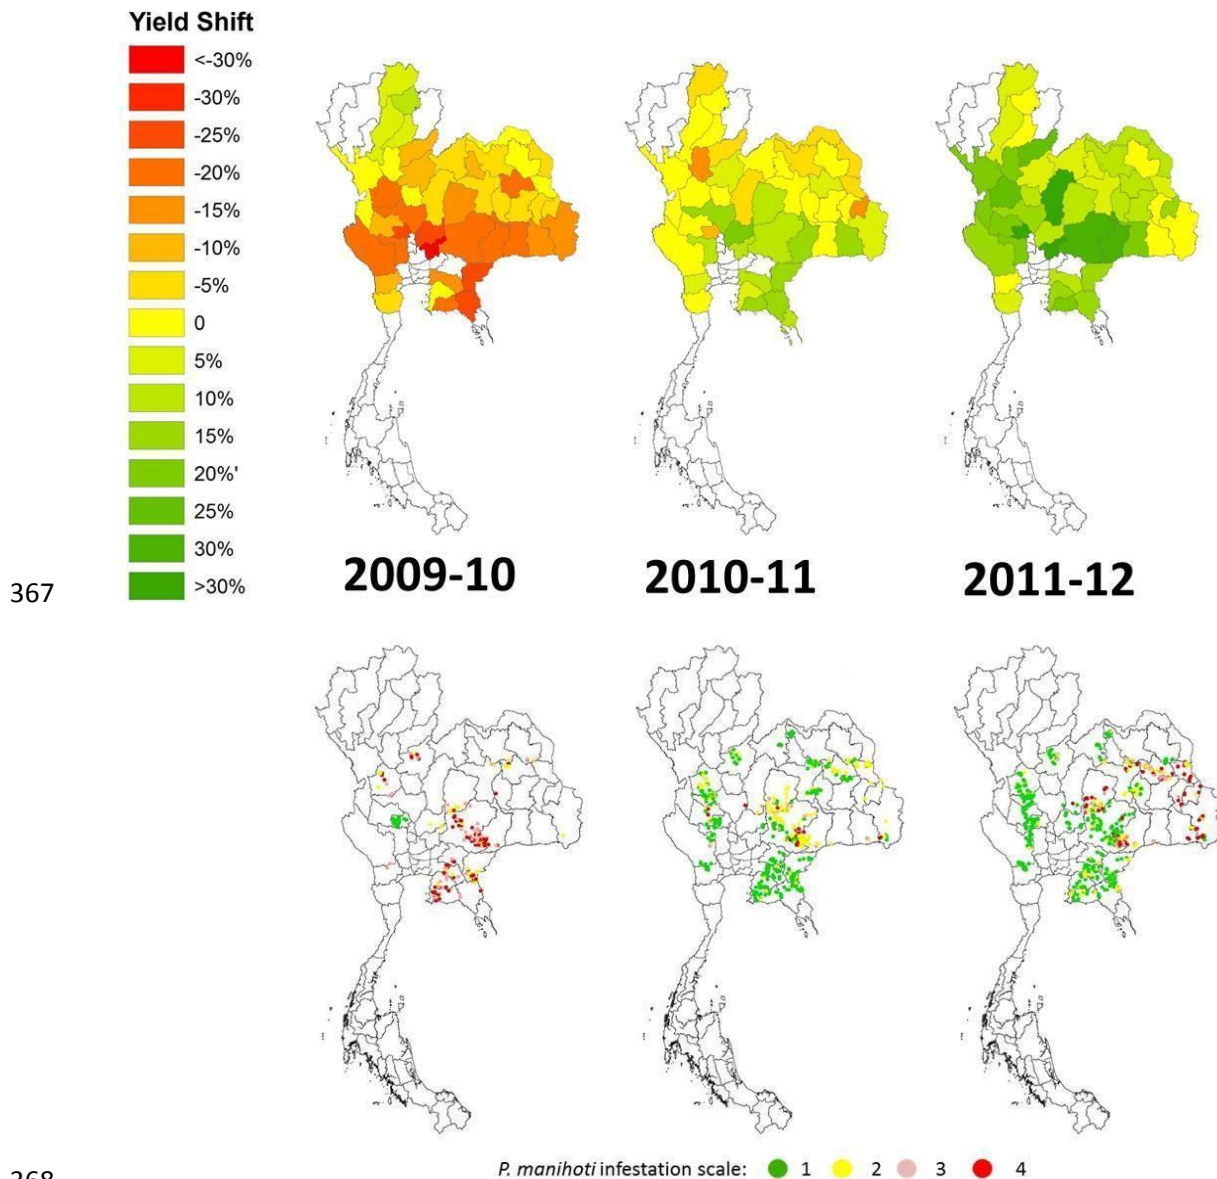

370 **Figure 2.** Yield recovery following biological control in Thailand's cassava crop over 2009-  
371 **12.** Patterns are reflective of the country-wide cassava mealybug invasion (late 2008 onward)  
372 and ensuing biological control campaign. The *upper panel* reflects annual change in cassava crop  
373 yield (for a given year, in percent as compared to the previous year) for a select set of provinces  
374 (adapted from Wyckhuys et al., 2018). In the *lower panel*, historical records of *P. manihoti*  
375 spatial distribution and field-level infestation pressure are shown over successive growing  
376 seasons (data facilitated through Thai Royal Government).

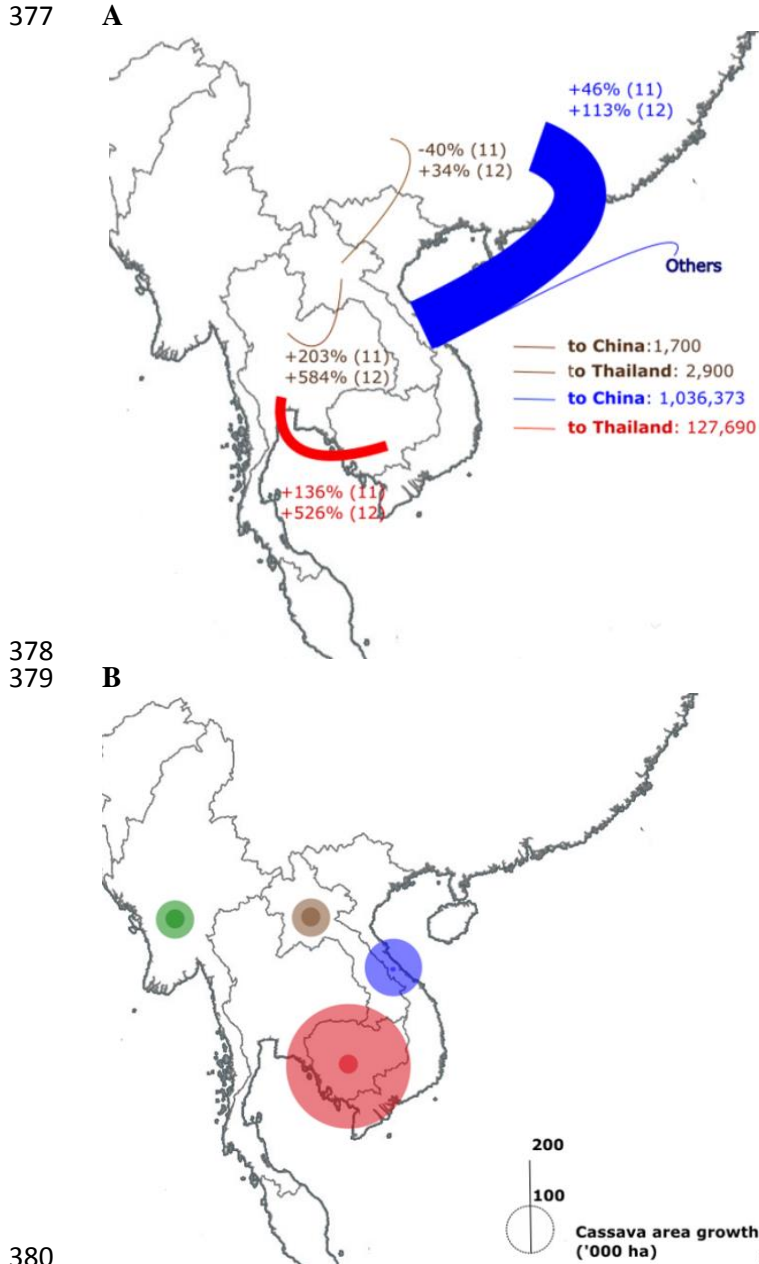

**Figure 3. Annual shifts in inter-country cassava trade mirror country-level expansion of cassava cropping area.** In *panel A*, export volume is depicted of cassava roots, chips and pellets from Cambodia and Lao PDR (to Thailand and China) and Vietnam (to China). Thickness of the arrow reflects relative volume of traded cassava, and yearly increases in export volume are specified for 2010-2011, and 2011-2012 (*A*). *Panel B* depicts the annual rate of increase in harvested cassava area (ha) for individual Southeast Asian countries (except Thailand), from 2009 until 2011.

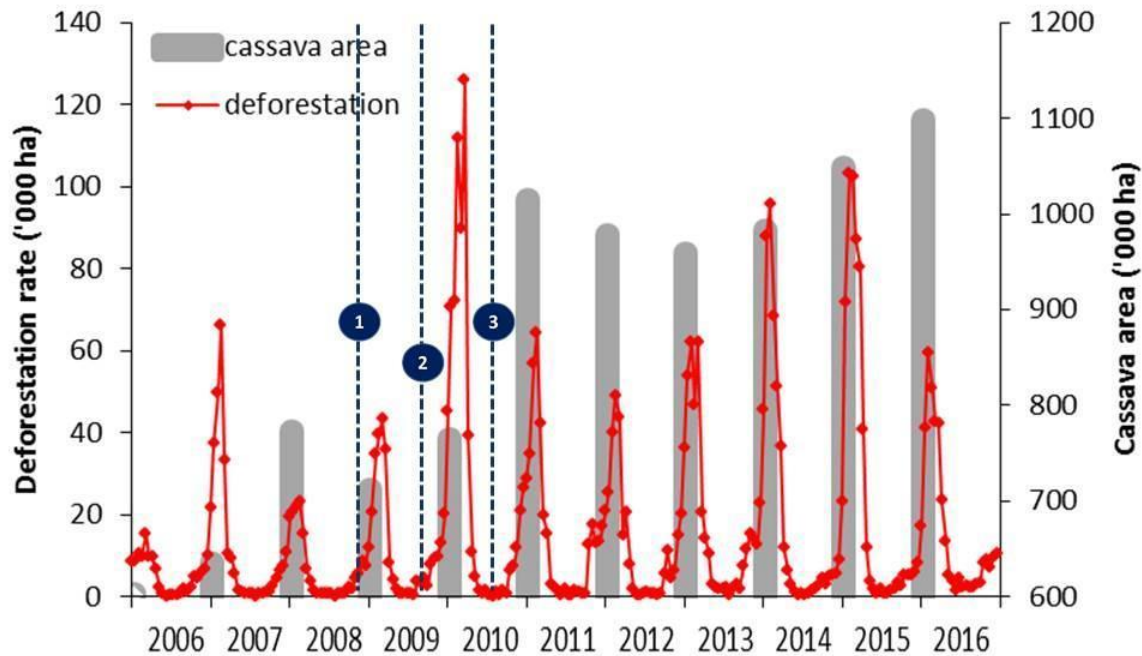

390

391 **Figure 4. Near real-time deforestation patterns relate to the annual increase in (harvested)**

392 **cassava area over a 2006-2016 time period.** Patterns cover a) the late 2008 invasion and

393 subsequent regional spread of *P. manihoti* (event # 1), b) the initial introduction of *A. lopezi* from

394 Benin, West Africa (event #2), and c) nation-wide parasitoid release in cassava fields across

395 Thailand (event # 3). Deforestation and cassava area growth statistics are compiled from

396 individual country records of Lao PDR, Vietnam, Cambodia and Myanmar.

397 A

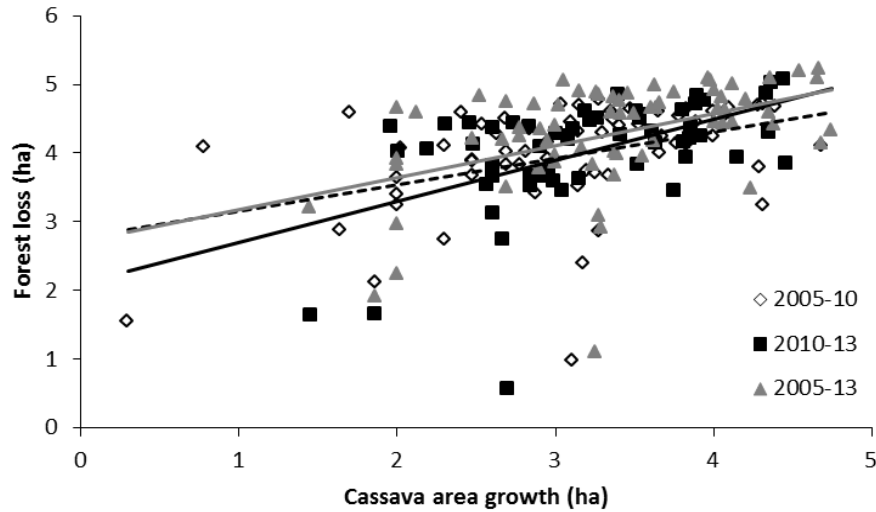

398

399 B

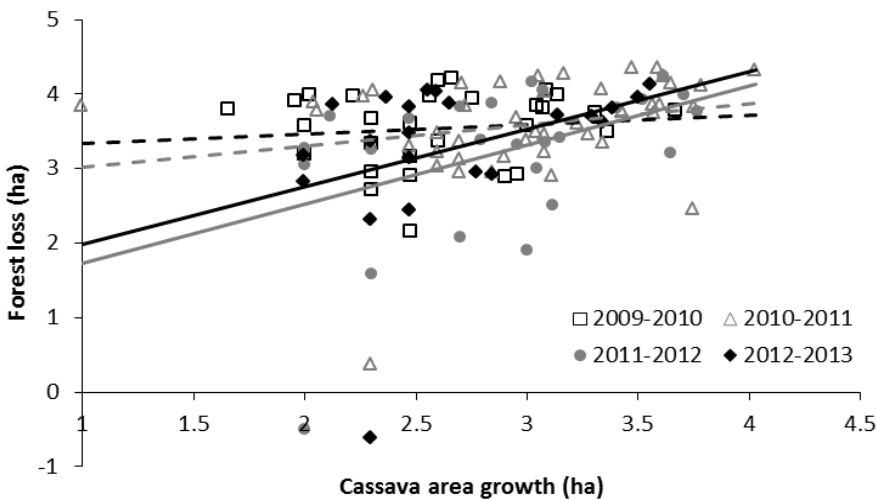

400

401 **Figure 5. Regional and country-specific patterns in deforestation relate to growth of**  
402 **cassava cropping area over 2005-2013.** *Panel A* represents regional patterns, showing  
403 province-level cassava area increase (ha) in Viet Nam, Cambodia and Lao PDR as related to  
404 degree of forest loss (ha) over a 2005-10, 2010-2013 and entire 2005-2013 time frame. *Panel B*  
405 contrasts annual forest loss against increase in (harvested) cassava area, for 40 different  
406 Vietnamese provinces. Both variables are log-transformed, and only certain regression lines in  
407 *panel B* reflect statistically significant patterns (ANOVA,  $p < 0.05$ ; see text for further statistics).  
408 Data are exclusively shown for provinces and time-periods in which cassava area expansion was  
409 recorded. Dashed lines represent patterns for 2005-10 (panel A) and 2009-10, 2010-11 (panel B).



410 A

B

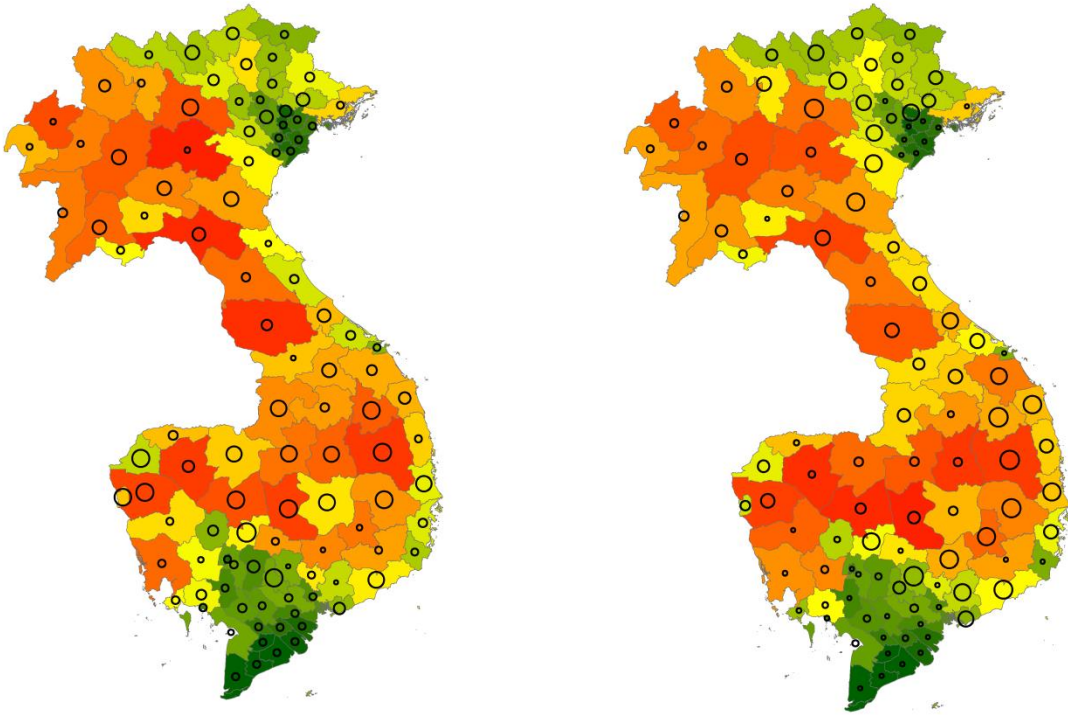

411

412

413

414 **Figure 6.** Forest loss relates to cassava area expansion across the Greater Mekong sub-  
415 region, over two distinct time periods (i.e., 2005-2010, A; 2010-2013, B). Province-level  
416 deforestation and cassava area growth over particular time periods are contrasted for Lao PDR,  
417 Cambodia and Vietnam, with bubble size depicting cassava area growth (ha) and coloring  
418 reflecting level of forest loss (with increasing levels of forest loss indicated by colors ranging  
419 from green to red).

420

421 **Methods**

422

423 i. Pest & parasitoid survey

424

425 Insects were surveyed in 549 cassava fields in Myanmar, Thailand, Lao PDR, Cambodia, Viet

426 Nam and southern China, from early 2014 until mid-2015, using standard protocols (see <sup>18</sup>).

427 Briefly, 8-10 month old fields in the main cassava-growing provinces of each country were

428 selected with assistance from local plant health authorities, with sites located at least 1 km apart

429 and within easy reach by vehicle. Surveys were conducted January-May 2014 (dry season),

430 October-November 2014 (late rainy season) and January-March 2015 (dry season). Locations

431 were recorded using a handheld GPS (Garmin Ltd, Olathe, KS). Five linear transects were

432 established per field (or site), departing from positions along an X sampling pattern covering the

433 entire cassava field. Ten consecutive plants were sampled along each transect, thus yielding a

434 total of 50 plants per site. Each plant was assessed for the presence and abundance (i.e., number

435 of individuals per infested tip) of *P. manihoti*. In-field identification of *P. manihoti* was based on

436 morphological characters, and samples were equally transferred to the laboratory for further

437 taxonomic confirmation. For each site, average *P. manihoti* abundance (per infested tip) and

438 field-level incidence (i.e., proportion of *P. manihoti*-infested tips) was calculated.

439 To contrast local *P. manihoti* infestation pressure with *A. lopezi* parasitism rates, we sampled

440 during 2014 and 2015 at a random sub-set of mealybug-invaded sites in different provinces in

441 Thailand ( $n= 5$ ), Cambodia ( $n = 10, 15$  per province), and southern Vietnam ( $n= 18, 20, 22$ ). In

442 doing so, samples were obtained from both smallholder-managed, diversified systems (i.e., 1-2

443 ha in size) and from mid- to large-scale plantations (i.e., at least 5-10 ha in size). Sampling for *A.*



444 *lopezi* parasitism consisted of collecting 20 mealybug-infested cassava plant tips at each site  
445 which were transferred to a field laboratory for subsequent parasitoid emergence. Upon arrival in  
446 the laboratory, each cassava plant tip was examined, predators were removed and *P. manihoti*  
447 counted. Next, tips were placed singly into transparent polyvinyl chloride (PVC) containers,  
448 covered with fine cotton mesh. Over the course of three weeks, containers were inspected daily  
449 for emergence of *A. lopezi* parasitic wasps. Parasitism levels of *A. lopezi* (per tip and per site)  
450 were calculated. Next, for sites where *A. lopezi* was found, we analyzed field-level *P. manihoti*  
451 abundance with *A. lopezi* parasitism rate with linear regression (see also <sup>18</sup>). Variables were log-  
452 transformed to meet assumptions of normality and homoscedasticity, and all statistical analyses  
453 were conducted using SPSS (PASW Statistics 18).

454

#### 455 ii. Country-specific cassava production and trade trends

456

457 To assess how mealybug invasion and ensuing parasitoid-mediated cassava yield recovery  
458 affected cassava production and trade, we examined country-level production and inter-country  
459 trade for cassava-derived commodities. More specifically, we contrasted cassava yield and  
460 production trends with inter-country trade flows over periods spanning the 2008 *P. manihoti*  
461 invasion, the 2009 *A. lopezi* introduction into Thailand and the subsequent (natural, and human-  
462 aided) continent-wide distribution of *A. lopezi* (mid-2010 onward). Our assessments detailed  
463 shifts in cassava production (harvested area, ha) and yearly trade flows (quantity) of cassava-  
464 derived commodities into Thailand from neighboring countries within the *P. manihoti* invaded  
465 range.

466 Crop production statistics for Thailand were obtained through the Office of Agricultural  
467 Economics (OAE), Ministry of Agriculture & Cooperatives (Bangkok, Thailand). Furthermore,  
468 country-specific patterns of cassava production (harvested area, ha) and yield (t/ha) were  
469 obtained for Viet Nam, Myanmar, Lao PDR and Cambodia via the FAO STAT database  
470 (<http://www.fao.org/faostat/>). To assess structural changes in the inter-country trade of cassava-  
471 derived commodities, we extracted data from the United Nations Comtrade database  
472 (<https://comtrade.un.org/>). Over a 2006-2016 time period, we recorded the following evolutions  
473 in terms of quantity (tonnes): global annual imports of cassava-derived commodities to Thailand  
474 (reporting) and China, from ‘All’ trade partner countries. More specifically, we queried the  
475 database for bilateral trade records of three cassava-derived commodities and associated  
476 Harmonized System (HS) codes: “Cassava whether or not sliced - as pellets, fresh or dried”  
477 (71410), “Tapioca & substitutes prepared from starch” (1903), and “Cassava starch” (110814).  
478 Given the occasional inconsistencies in country-reported trade volumes or values in either FAO  
479 STAT or Comtrade databases, cross-checks were made with databases from the Thai Tapioca  
480 Starch Association (TTSA) and rectifications were made accordingly.

481

482 iii. Country-specific trends in forest loss vs. cassava area growth

483

484 To infer the likely impact of cassava area growth on forest loss in different Southeast Asian  
485 countries, we obtained data from both a near-real time vegetation monitoring system, Terra-i  
486 (<https://www.terra-i.org>) and deforestation data from Global Forest Watch <sup>50</sup>  
487 (<https://www.globalforestwatch.org/>). Terra-i relies upon satellite-derived rainfall and vegetation  
488 data obtained through TRMM sensor data (Tropical Rainfall Monitoring Mission) and MODIS

489 MOD13Q1 respectively, to detect deviations from natural vegetation phenology patterns that  
490 cannot be explained by climatic events. More specifically, Terra-i adopts computational neural  
491 networks to detect how vegetation vigor behaves at a given site over a period of time in relation  
492 to observed rainfall, and thus identifies certain anomalies while accounting for the effects of  
493 drought, flooding and cloud cover or other image ‘noise’. Changes in vegetation greenness at the  
494 landscape level are recorded on the Terra-i platform on a bi-weekly basis. Terra-i outputs have  
495 been validated through comparison with the Global Forest Change data and the PRODES system  
496 in Brazil. This showed that these datasets are similar as the average KAPPA coefficient was of  
497  $0.96 \pm 0.004$ . Furthermore, the average recall value for detection of events with an area of 90%  
498 to 100% of a MODIS pixel is of  $0.9 \pm 0.05$  which shows that Terra-i detects the large-size  
499 events. However, an average recall of  $0.28 \pm 0.13$  has been observed when the event size is about  
500 10% of a MODIS pixel, showing a limitation of Terra-I to detect smaller size tree cover  
501 clearance. Country-level deforestation statistics over a 10-year time period were extracted from  
502 this platform for Lao PDR, Myanmar, Viet Nam and Cambodia, and data were compiled on a  
503 province level for each year from 2005 to 2013.

504 Next, yearly province-level records of cassava (harvested) area were compiled for each of the  
505 different countries by accessing FAO STAT, the Cambodia 2013 agriculture census and primary  
506 datasets as facilitated through national authorities and the International Food Policy Research  
507 Institute (IFPRI), Washington DC, USA. For Lao PDR, province-level records were only  
508 available on cultivated area of all root crops combined. Here, we assumed that major inter-annual  
509 changes in harvested area of root crops in Lao PDR can be ascribed to cassava as other locally-  
510 important root crops, such as yam and sweetpotato are mostly grown for subsistence purposes  
511 and are less subject to major inter-annual area shifts. No continuous yearly datasets on local

512 cassava cultivation area were available for Cambodia, and no province-level cassava cultivation  
513 records could be accessed for Myanmar. Because of these variations in available data some  
514 analyses were carried out over different periods (see below).

515 To quantify the extent to which forest loss was related to cassava area expansion, two types of  
516 analyses were conducted. First, we used linear regression to relate province-level increases in  
517 harvested cassava cropping area with forest loss during that same period for all countries (i.e.,  
518 Cambodia, Lao PDR, Viet Nam), over three different time frames: 2005-2010, 2010-2013 and  
519 2005-2013. Second, as complete annual records on (province-level) cassava cultivation were  
520 available for Viet Nam, linear regression analysis allowed annual province-level trends in forest  
521 loss to be related to cassava expansion for individual years (2009-2013) relating. To meet  
522 assumptions of normality and heteroscedasticity, data were subject to log-normal (for cassava  
523 area records) or rank-based inversed normal transformation (for deforestation rates and records).  
524 All statistical analyses were conducted using SPSS (PASW Statistics 18)

525

#### 526 iv. Data Availability

527

528 Upon acceptance of the manuscript, all data will be made available in an appropriate public  
529 structured data depository, and the accession number(s) provided in the manuscript.

530

531

532

533

534 **Supplementary information**

535

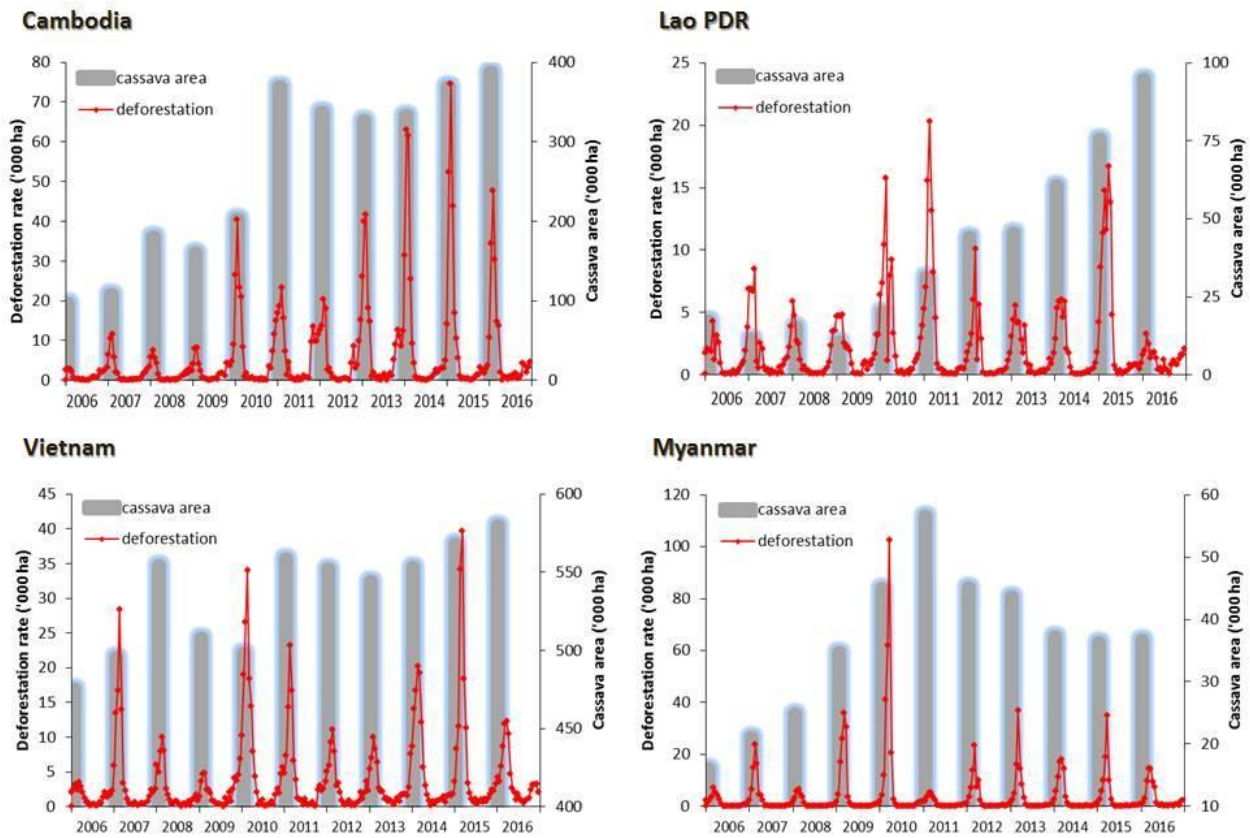

536

537 Supplementary Figure 2. Country-specific deforestation patterns as related to the annual increase  
538 in (harvested) cassava area over a 2006-2016 time period, covering the late 2008 invasion and  
539 subsequent continent-wide spread of *P. manihoti*, and the release of *A. lopezi* across Thailand in  
540 mid-2010.

541

542 A

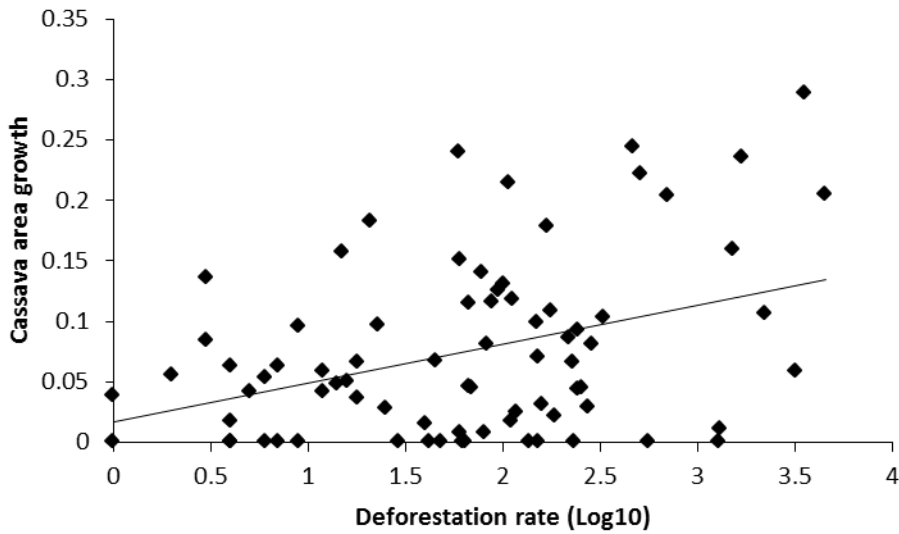

543

544 B

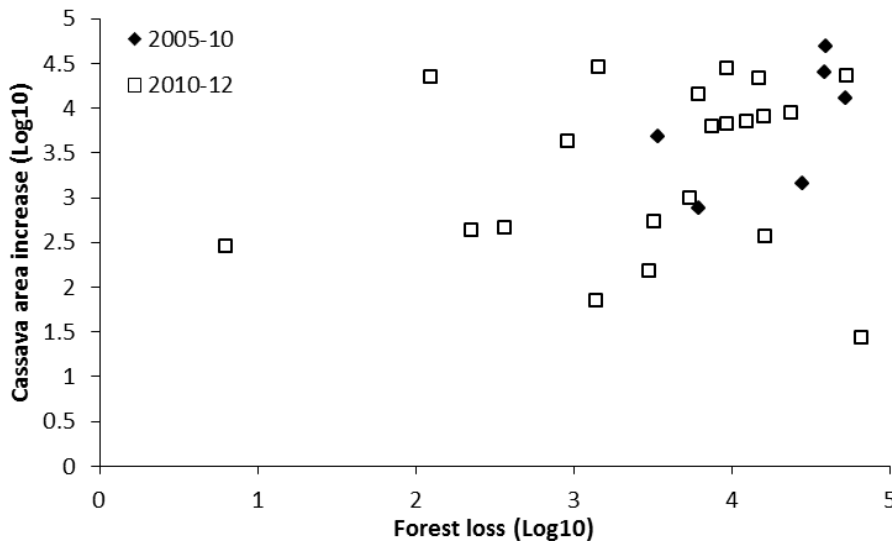

545

546

547 Supplementary Figure 3. Country-level cassava area-growth patterns, as related to local forest loss. Panel

548 A depicts the proportional annual increase in (planted) cassava area as related to local degree of forest

549 loss during the preceding year, for 40 different Vietnamese provinces over a 2008-2012 time period.

550 *Panel B* represents province-level cassava area increase (ha) as related to degree of forest loss (ha), for 24

551 Cambodian provinces over a 2005-10 and 2010-12 time frame. Data are exclusively shown for provinces

552 and time-periods in which cassava area expanded. Annual deforestation rates are log-transformed, and the

553 regression line in *panel A* reflects a statistically significant pattern (ANOVA,  $p < 0.05$ ).

554

## 555 Farmer adoption of insecticide use

556

### 557 1. Materials & Methods:

558

559 From 2014 until 2016, extensive farmer surveys were conducted in Thailand, Cambodia and  
560 Vietnam. In all three countries, household-level surveys were carried out using semi-structured  
561 questionnaires with open-ended questions, to optimally gauge farmer's knowledge and pest  
562 management behavior. One interview was done per household, following a person-to-person  
563 interview format. A semi-structured questionnaire was employed, with open-ended questions to  
564 better elicit farmer knowledge. The questionnaire was pre-tested and revised prior to use at the  
565 national level, in a given country. In Thailand, surveys were entirely carried out by local officers  
566 from the Thai Department of Agricultural Extension (DoAE), while trained enumerators  
567 supported by local authorities (General Directorate of Agriculture of Cambodia, and Plant  
568 Protection Department, Vietnam) took part in survey activities in the other two countries. At all  
569 sites, surveys were conducted by interviewers that were fluent in the local languages. Though  
570 survey instruments were designed for multiple purposes (e.g., Delaquis et al., unpublished), we  
571 only cover pest management activities in this study. For assessment of local pest management  
572 behavior, farmers were asked to freely enumerate knowledge and adoption of management  
573 practices for control of *P. manihoti*. Particular attention was paid to farmers' reported usage of  
574 (preventative) dips with neonicotinoid insecticides.

575 In Thailand, farmer surveys were conducted in a total of 33 cassava-growing provinces over  
576 the course of 2014 (i.e., 6 years after the initial detection of *P. manihoti*). In each province, a  
577 variable number of farmers was interviewed by DoAE personnel, ranging from n= 20 (Roy-et,  
578 Payao) to n= 348 (Karnchanaburi), attaining a grand total of 2,505 cassava farmers in the  
579 national territory. Sample size was determined by local authorities, and is only partially  
580 reflective of the number of cassava growers in a given province. In Cambodia and Vietnam,  
581 nation-wide surveys were carried out in a more systematic fashion in at least 15 districts per  
582 country during late 2016 (i.e., 8 years following the initial detection of *P. manihoti* in Thailand).  
583 In these two countries, interviews were focused in districts with the largest area of cassava  
584 production. Within each district, a total of 15 cassava growers were randomly selected and  
585 interviewed, attaining the following respective sample sizes for Cambodia and Vietnam: n= 240  
586 (16 districts) and n= 206 (15 districts). District-level adoption rates were pooled per province for  
587 either country, and mapped at a regional scale.

588

### 589 2. Results:

590

591 In Thailand, 71.3% farmers (n= 2,505) used prophylactic dips with systemic insecticides for *P.*  
592 *manihoti* management (Supplementary Fig. 3). Regional adoption rates of insecticide dips ranged  
593 from 45.8% in eastern parts to 90.3% in northern areas of the country. Province-level rates of  
594 insecticide use were highest in Payao and Tak (100%; n= 20, 38 respectively), Lampang (98.0%;  
595 n= 49), Utaradit (96.1%; n= 26), Yasothorn (92.9%; n= 84) and Loei (91.9%; n= 123).

596

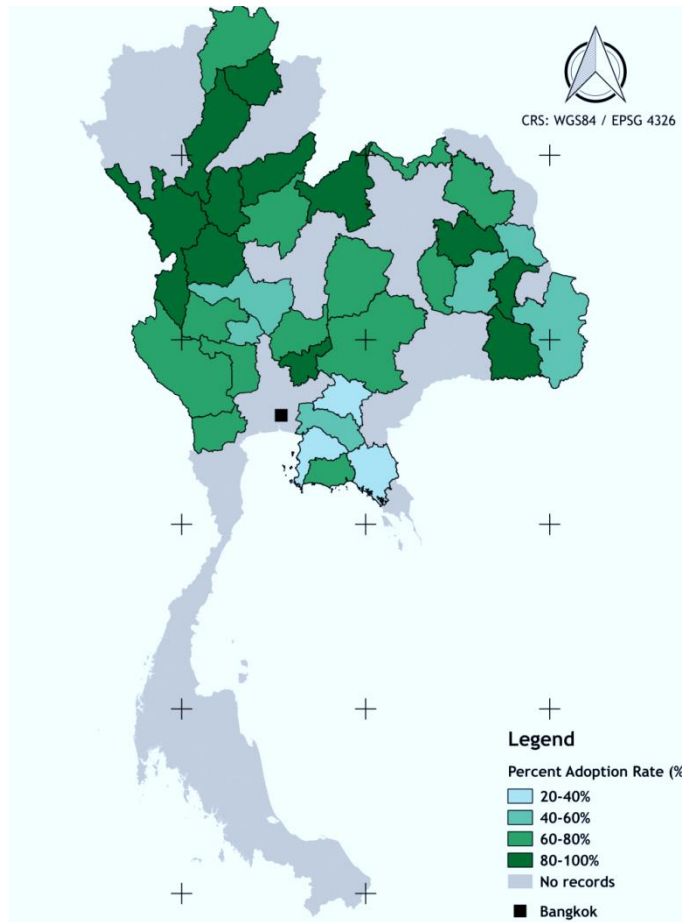

597  
598  
599  
600  
601  
602  
603  
604  
605

Supplementary Figure 4. Level of adoption of prophylactic insecticide dips amongst cassava farmers in 33 different provinces across Thailand, as recorded during mid-2014. Adoption levels are expressed as % of surveyed farmers in each province, within a nationwide survey of 2,500 growers ( $n= 20-348$  per province). For provinces in grey, no data were obtained.
